# Supplementary material
Source: Springer Nature journal article supplement (https://www.springermedizin.de/resource/supplementary/12889_2010_2835_MOESM1_ESM.pdf/9487546)

**A.**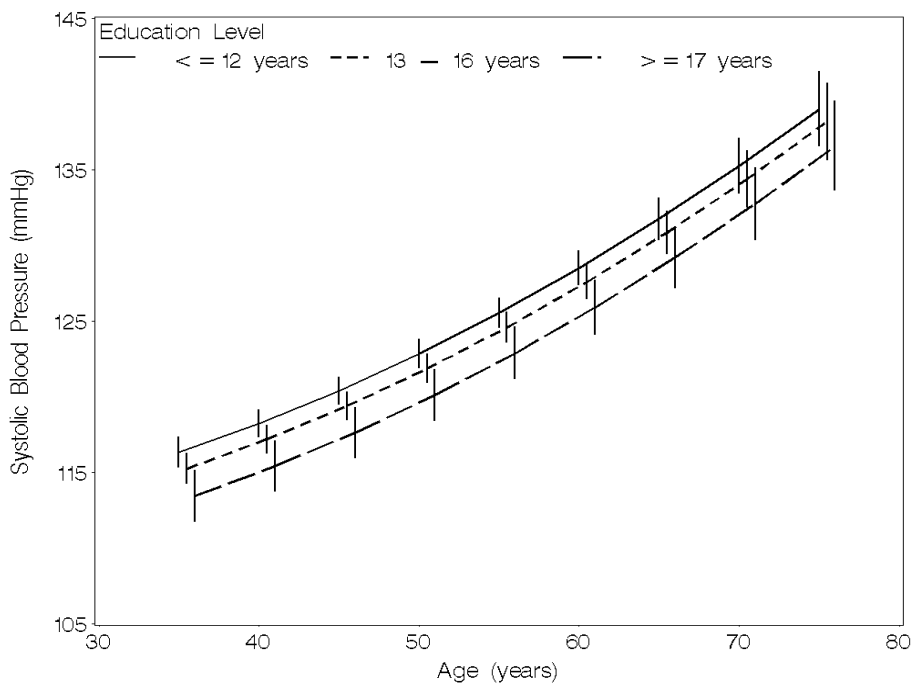**B.**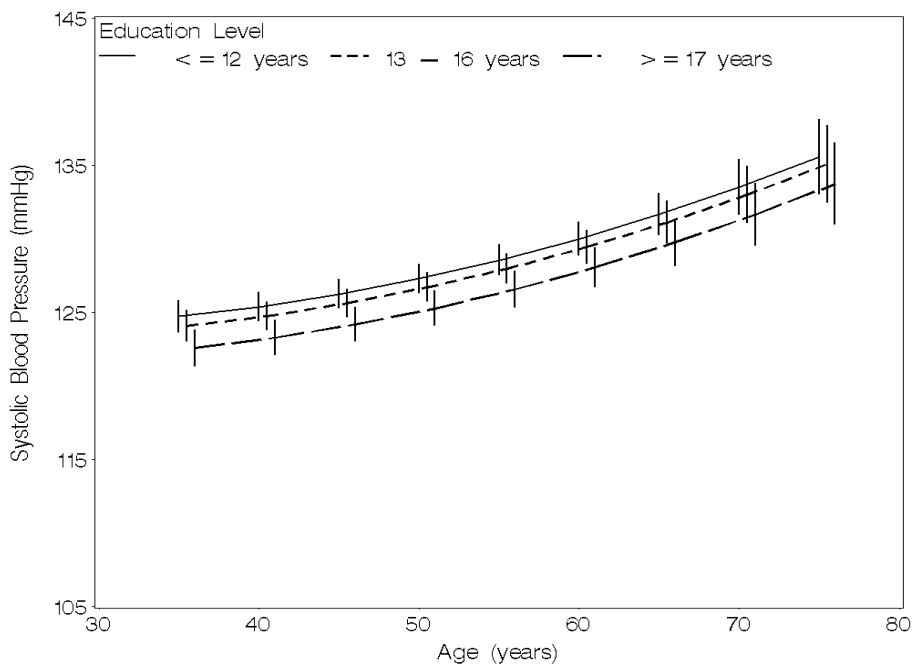

Supplement: MOESM1 [file 9487546]
